# Supplementary material for: Mutations that confer resistance to broadly-neutralizing antibodies define HIV-1 variants of transmitting mothers from that of non-transmitting mothers
Source: PLoS Pathog. 2021 Apr 2;17(4):e1009478. doi: 10.1371/journal.ppat.1009478 (PMC8055002; doi:10.1371/journal.ppat.1009478)
Supplement: S3 Table — (XLSX) [file ppat.1009478.s003.xlsx]

## Sheet: Latest run (qm )
S3 Table: GenSig output at sites where significant associations were found, broken down by FRD<0.5 and FDR<0.1																	Table 2 (T2), testaa A			NOTE: Feature=1 is resistance for nbAbs, transmission for TranStatus, and sensitivity for Plasma
Column A (tbl): T2 for associations with mutations toward a certain amino acid, T3 for associations with mutations away from a certain amino acid																	!A -> A	!A->!A
Column B (HXB2aa): HXB2 amino acid position																feature=1	r1c1	r1c2
Column C (HXB2nuc): HXB2 nucleotide position																feature=0	r2c1	r2c2
Column D (localaa): amino acid position from beginning of alignment																OR>1 means that mutations to A FAVOR feature=1
Column E (localnuc): nucleotide position from beginning og alignment																OR<1 means that mutations to A FAVOR feature=0
Column F (testaa): amino acid being tested
Column G (feature): phenotype being tested (always binomial, either highest quartile versus lower 3 or high 3 quartiles versus lowest one).																	Table 3 (T3), testaa A
Column H (pvalue): raw p-value from Fisher exact test																	A->!A	A->A
Columns B I-L: raw cell counts from Fisher contingency table (see columns Q-R-S for example)																feature=1	r1c1	r1c2
Column M (qvalue): FDR mutliple test correction																feature=0	r2c1	r2c2
Column N (oddsRatio): odds ratio from Fisher contingency table, calculated as (r1c1*r2c2)/(r1c2*r2c1)																OR>1 means that mutations AWAY from A FAVOR feature=1
																OR<1 means that mutations AWAY from A FAVOR feature=0
tbl	HXB2aa	HXB2nuc	localaa	localnuc	testaa	feature	pvalue	r1c1	r1c2	r2c1	r2c2	qvalue	oddsRatio
T3	K6	6240	9	25	N	PG9HighestQ	0.00197	4	52	0	204	0.0228	Inf				Glyco Table 3 (T3g), testaa Y (yes) or N (no)
T2	V87	6483	93	277	K	PG9HighestQ	0.00107	5	63	0	193	0.02	Inf				A->!A	A->A
T3	V87	6483	93	277	E	PG9HighestQ	0.00309	6	46	1	121	0.0303	15.5			feature=1	r1c1	r1c2
T3	T140	6642	177	529	T	PG9HighestQ	0.00335	8	55	4	170	0.0303	6.12	V1		feature=0	r2c1	r2c2
T3g	N141	6645	178	532	N	DH429Upper3Q	0.00221	1	126	6	44	0.0101	0.0592	V1
T3	N141	6645	178	532	T	PG9HighestQ	0.000983	6	33	1	117	0.0176	20.8	V1		If A=Yes, OR>1 means LOSS of PNG favors feature=1
T3g	N141	6645	178	532	N	PlasmaHighestQ	0.00293	6	49	1	130	0.0261	15.7	V1		If A=No, OR>1 means ACQUISITION of PNG favors feature=1
T3g	N160	6702	212	634	Y	PG9HighestQ	0.000118	6	62	0	230	0.000919	Inf
T3	N160	6702	212	634	N	PG9HighestQ	0.000118	6	62	0	230	0.00146	Inf			Feature=1 is resistance for nbAbs, transmission for TranStatus, and sensitivity for Plasma
T2	N160	6702	212	634	K	PG9HighestQ	0.000551	5	63	0	230	0.0107	Inf
T2	N229	6909	291	871	K	VRC01HighestQ	0.00314	4	58	0	195	0.045	Inf			Associations with sites in V1 or V4 are not reliable due to the hypervariability of these regions, which makes it impossible to align across subjects
T3	N234	6924	296	886	N	TranStatus	0.00263	1	128	11	116	0.0203	0.083
T2	N234	6924	296	886	D	TranStatus	0.00333	0	143	8	133	0.0219	0
T2	N234	6924	296	886	D	VRC01Upper3Q	1.54e-05	0	226	8	71	7.87e-05	0
T3	N234	6924	296	886	N	VRC01Upper3Q	1.05e-05	2	201	11	61	0.000155	0.0559
T3	N295	7107	357	1069	N	VRC01Upper3Q	0.000851	0	196	5	60	0.0199	0
T3	S347	7263	411	1231	K	TranStatus	0.00141	5	11	1	57	0.0114	24.3
T3	S347	7263	411	1231	E	DH512HighestQ	0.0101	4	11	0	29	0.175	Inf
T3	R350	7272	414	1240	R	PG9HighestQ	9.47e-05	9	41	4	198	0.00146	10.7
T3g	T394	7404	459	1375	N	TranStatus	0.000898	0	143	11	145	0.00305	0	V4
T3g	T408	7446	492	1474	N	DH429Upper3Q	1.72e-05	1	206	10	71	6.56e-05	0.0349	V4
T3g	T408	7446	492	1474	N	PG9Upper3Q	0.00116	3	220	8	69	0.0081	0.119	V4
T3g	T408	7446	492	1474	N	TranStatus	0.000858	0	139	11	138	0.00305	0	V4
T3	A612	8058	730	2188	A	TranStatus	0.00137	1	93	9	55	0.0114	0.0667
T2	S640	8142	759	2275	S	TranStatus	0.0018	0	123	10	125	0.0145	0
T2	A792	8598	912	2734	I	VRC01HighestQ	0.00101	7	52	2	177	0.0196	11.8
T2	V829	8709	949	2845	V	DH429HighestQ	0.000413	4	15	0	105	0.00777	Inf
T3	V829	8709	949	2845	I	DH429HighestQ	0.000749	4	14	0	83	0.0347	Inf
T3	V833	8721	953	2857	L	DH429Upper3Q	0.000858	2	150	7	42	0.0309	0.0813
T3	V833	8721	953	2857	L	PG9HighestQ	0.00186	7	51	2	153	0.0228	10.4
T3	V833	8721	953	2857	L	TranStatus	0.00117	9	90	0	106	0.0114	Inf
T2	V833	8721	953	2857	V	VRC01HighestQ	0.00108	5	58	0	178	0.0196	Inf
Qvalue > 0.05
tbl	HXB2aa	HXB2nuc	localaa	localnuc	testaa	feature	pvalue	r1c1	r1c2	r2c1	r2c2	qvalue	oddsRatio
T3	M95	6507	102	304	M	VRC01Upper3Q	0.0045	0	236	4	80	0.0817	0
T3g	N136	6630	155	463	Y	DH429Upper3Q	0.0214	3	186	5	55	0.0887	0.179	V1
T3	T140	6642	177	529	T	DH429Upper3Q	0.00364	3	154	8	60	0.0685	0.148	V1
T2	T140	6642	177	529	N	DH429Upper3Q	0.00237	0	188	5	77	0.0704	0	V1
T3g	T140	6642	177	529	N	DH429Upper3Q	0.0245	1	207	4	79	0.0887	0.0963	V1
T3g	N141	6645	178	532	N	PG9HighestQ	0.0153	5	43	2	130	0.0872	7.45	V1
T3	S143	6651	189	565	S	DH429HighestQ	0.00199	9	59	5	192	0.0516	5.81	V1
T3g	N230	6912	292	874	Y	DH512HighestQ	0.00628	4	16	1	75	0.0755	17.9
T2	N289	7089	351	1051	H	PG9HighestQ	0.00373	4	73	0	230	0.0595	Inf
T2	E293	7101	355	1063	K	VRC01Upper3Q	0.00355	0	212	4	66	0.0855	0
T2	S347	7263	411	1231	T	DH429Upper3Q	0.00427	1	199	5	62	0.0704	0.0631
T3	S347	7263	411	1231	E	DH512HighestQ	0.0101	4	11	0	29	0.175	Inf
T2	R350	7272	414	1240	K	PG9HighestQ	0.00379	5	49	2	219	0.0595	11
T3	K357	7293	422	1264	K	DH429HighestQ	0.00333	4	62	0	204	0.0565	Inf
T3g	N386	7380	451	1351	Y	TranStatus	0.0196	1	142	9	139	0.0774	0.109	V4, not hypervariable
T3g	N392	7398	457	1369	Y	PlasmaHighestQ	0.0146	0	70	16	189	0.0557	0	V4
T3g	N392	7398	457	1369	Y	PlasmaUpper3Q	0.0255	15	173	1	86	0.166	7.42	V4
T3g	N406	7440	490	1468	Y	PlasmaHighestQ	0.0106	10	58	7	156	0.0557	3.82	V4
T3	N407	7443	491	1471	N	DH429HighestQ	0.0045	4	22	0	70	0.0746	Inf	V4
T3	S440	7542	535	1603	R	TranStatus	0.00811	5	60	0	102	0.0737	Inf
T3	V513	7761	629	1885	V	VRC01Upper3Q	0.00354	0	231	4	72	0.0783	0
T2	M535	7827	653	1957	I	DH429Upper3Q	0.00451	0	193	4	65	0.0704	0
T3	S644	8154	763	2287	T	DH429Upper3Q	0.00236	0	122	4	32	0.0644	0
T3	A792	8598	912	2734	V	VRC01HighestQ	0.00109	7	21	2	77	0.0573	12.4
T3	E831	8715	951	2851	E	TranStatus	0.00808	0	135	8	147	0.0737	0
T2	A836	8730	956	2866	A	VRC01HighestQ	0.00489	5	28	1	91	0.0981	15.8
